# Supplementary material for: Assessing Global Efforts in the Selection of Vertebrates as Umbrella Species for Conservation
Source: MDPI journal article supplement (doi:10.3390/biology12040509), 2023-03-28
Supplement: s1 [file s1]

**Table S1.** A full list of the 242 scientific articles with umbrella species as study species published since 1984 to 2021, and terrestrial vertebrate species they recommended as umbrella species.

| No. | Article                        | Published year | Common name             | Scientific name                | Class    | Study country /region    |
|-----|--------------------------------|----------------|-------------------------|--------------------------------|----------|--------------------------|
| 1   | De Vries 1995                  | 1995           | Alpine Ibex             | <i>Capra ibex</i>              | Mammalia | Europe                   |
| 2   | De Vries 1995                  | 1995           | Iberian Ibex            | <i>Capra pyrenaica</i>         | Mammalia | Europe                   |
| 3   | De Vries 1995                  | 1995           | European Roe deer       | <i>Capreolus capreolus</i>     | Mammalia | Europe                   |
| 4   | De Vries 1995                  | 1995           | Red Deer                | <i>Cervus elaphus</i>          | Mammalia | Europe                   |
| 5   | De Vries 1995                  | 1995           | Northern Chamois        | <i>Rupicapra rupicapra</i>     | Mammalia | Europe                   |
| 6   | De Vries 1995                  | 1995           | Wild Boar               | <i>Sus scrofa</i>              | Mammalia | Europe                   |
| 7   | Noss et al. 1996               | 1996           | Brown Bear              | <i>Ursus arctos</i>            | Mammalia | Canada, US               |
| 8   | Berger 1997                    | 1997           | Black Rhino             | <i>Diceros bicornis</i>        | Mammalia | Africa                   |
| 9   | Singh et al. 1997              | 1997           | Lion-tailed Macaque     | <i>Macaca silenus</i>          | Mammalia | India                    |
| 10  | Martikainen et al. 1998        | 1998           | White-backed Woodpecker | <i>Dendrocopos leucotos</i>    | Aves     | Finland, Russian Karelia |
| 11  | Savignac et al. 2000           | 2000           | Pileated Woodpecker     | <i>Hylatomus pileatus</i>      | Aves     | Canada                   |
| 12  | van Langevelde et al. 2000     | 2000           | Eurasian Nuthatch       | <i>Sitta europaea</i>          | Aves     | Netherland               |
| 13  | Carroll et al. 2001            | 2001           | Canada Lynx             | <i>Lynx canadensis</i>         | Mammalia | Canada, US               |
| 14  | Carroll et al. 2001            | 2001           | Brown Bear              | <i>Ursus arctos</i>            | Mammalia | Canada, US               |
| 15  | Gerrard et al. 2001            | 2001           | Kit Fox                 | <i>Vulpes macrotis</i>         | Mammalia | US                       |
| 16  | Longepierre et al. 2001        | 2001           | Hermann's Tortoise      | <i>Testudo hermanni</i>        | Reptilia | Europe                   |
| 17  | Loyn et al. 2001               | 2001           | Powerful Owl            | <i>Ninox strenua</i>           | Aves     | Australia                |
| 18  | Loyn et al. 2001               | 2001           | Greater Sooty-owl       | <i>Tyto tenebricosa</i>        | Aves     | Australia                |
| 19  | Poiani et al. 2001             | 2001           | Greater Prairie-chicken | <i>Tympanuchus cupido</i>      | Aves     | US                       |
| 20  | Rubino 2001                    | 2001           | California Gnatcatcher  | <i>Poliophtila californica</i> | Aves     | US                       |
| 21  | Snaith and Beazley 2002        | 2002           | Moose                   | <i>Alces alces</i>             | Mammalia | Canada                   |
| 22  | Suter et al. 2002              | 2002           | Western Capercaillie    | <i>Tetrao urogallus</i>        | Aves     | Switzerland              |
| 23  | Borghesio and Ndang'ang'a 2003 | 2003           | Fischer's Turaco        | <i>Tauraco fischeri</i>        | Aves     | Tanzania                 |
| 24  | Kerley et al. 2003             | 2003           | Blesbok                 | <i>Damaliscus pygargus</i>     | Mammalia | South Africa             |
| 25  | Kerley et al. 2003             | 2003           | Mountain Zebra          | <i>Equus zebra</i>             | Mammalia | South Africa             |
| 26  | Kerley et al. 2003             | 2003           | Leopard                 | <i>Panthera pardus</i>         | Mammalia | South Africa             |
| 27  | Pakkala et al. 2003            | 2003           | Western Capercaillie    | <i>Tetrao urogallus</i>        | Aves     | Finland                  |
| 28  | Rubino and Hess 2003           | 2003           | Barred Owl              | <i>Strix varia</i>             | Aves     | US                       |
| 29  | Beazley and Cardinal 2004      | 2004           | Golden Eagle            | <i>Aquila chrysaetos</i>       | Aves     | Canada, US               |
| 30  | Beazley and Cardinal 2004      | 2004           | Upland Sandpiper        | <i>Bartramia longicauda</i>    | Aves     | Canada, US               |

|    |                              |      |                         |                                 |          |               |
|----|------------------------------|------|-------------------------|---------------------------------|----------|---------------|
| 31 | Beazley and Cardinal 2004    | 2004 | Northern Harrier        | <i>Circus hudsonius</i>         | Aves     | Canada, US    |
| 32 | Beazley and Cardinal 2004    | 2004 | Peregrine Falcon        | <i>Falco peregrinus</i>         | Aves     | Canada, US    |
| 33 | Beazley and Cardinal 2004    | 2004 | Common Loon             | <i>Gavia immer</i>              | Aves     | Canada, US    |
| 34 | Beazley and Cardinal 2004    | 2004 | Bald Eagle              | <i>Haliaeetus leucocephalus</i> | Aves     | Canada, US    |
| 35 | Beazley and Cardinal 2004    | 2004 | Reindeer                | <i>Rangifer tarandus</i>        | Mammalia | Canada, US    |
| 36 | Cadi et al. 2004             | 2004 | European Pond Turtle    | <i>Emys orbicularis</i>         | Reptilia | France        |
| 37 | Chouteau 2004                | 2004 | Coquerel's Coua         | <i>Coua coquereli</i>           | Aves     | Madagascar    |
| 38 | Comiskey et al. 2004         | 2004 | Puma                    | <i>Puma concolor</i>            | Mammalia | US            |
| 39 | Jones et al. 2004            | 2004 | Cerulean Warbler        | <i>Setophaga cerulea</i>        | Aves     | Canada        |
| 40 | Maciantowicz and Najbar 2004 | 2004 | European Pond Turtle    | <i>Emys orbicularis</i>         | Reptilia | Poland        |
| 41 | Nikolakaki 2004              | 2004 | Common Redstart         | <i>Phoenicurus phoenicurus</i>  | Aves     | England       |
| 42 | Bifolchi and Lode 2005       | 2005 | Eurasian Otter          | <i>Lutra lutra</i>              | Mammalia | North America |
| 43 | Matsuura et al. 2005         | 2005 | Grey-faced Buzzard      | <i>Butastur indicus</i>         | Aves     | Japan         |
| 44 | Mildenstein et al. 2005      | 2005 | Golden-capped Fruit Bat | <i>Acerodon jubatus</i>         | Mammalia | Philippines   |
| 45 | Mildenstein et al. 2005      | 2005 | Large Flying-fox        | <i>Pteropus vampyrus</i>        | Mammalia | Philippines   |
| 46 | Suorsa et al. 2005           | 2005 | Eurasian Treecreeper    | <i>Certhia familiaris</i>       | Aves     | Finland       |
| 47 | Bani et al. 2006             | 2006 | Short-toed Treecreeper  | <i>Certhia brachydactyla</i>    | Aves     | Italy         |
| 48 | Bani et al. 2006             | 2006 | Marsh Tit               | <i>Poecile palustris</i>        | Aves     | Italy         |
| 49 | Bani et al. 2006             | 2006 | Eurasian Nuthatch       | <i>Sitta europaea</i>           | Aves     | Italy         |
| 50 | Dunk et al. 2006             | 2006 | Spotted Owl             | <i>Strix occidentalis</i>       | Aves     | US            |
| 51 | Hager et al. 2006            | 2006 | Snapping Turtle         | <i>Chelydra serpentina</i>      | Reptilia | North America |
| 52 | Hager et al. 2006            | 2006 | Painted Turtle          | <i>Chrysemys picta</i>          | Reptilia | North America |
| 53 | Hager et al. 2006            | 2006 | Common Loon             | <i>Gavia immer</i>              | Aves     | North America |
| 54 | Hager et al. 2006            | 2006 | Bald Eagle              | <i>Haliaeetus leucocephalus</i> | Aves     | North America |
| 55 | Hager et al. 2006            | 2006 | White-tailed Deer       | <i>Odocoileus virginianus</i>   | Mammalia | North America |
| 56 | Hager et al. 2006            | 2006 | Osprey                  | <i>Pandion haliaetus</i>        | Aves     | North America |
| 57 | Hager et al. 2006            | 2006 | Red Fox                 | <i>Vulpes vulpes</i>            | Mammalia | North America |
| 58 | Koper and Schmiegelow 2006   | 2006 | Northern Pintail        | <i>Anas acuta</i>               | Aves     | Canada        |
| 59 | Koper and Schmiegelow 2006   | 2006 | Mallard                 | <i>Anas platyrhynchos</i>       | Aves     | Canada        |

|    |                            |      |                          |                                  |          |               |
|----|----------------------------|------|--------------------------|----------------------------------|----------|---------------|
| 60 | Koper and Schmiegelow 2006 | 2006 | Lesser Scaup             | <i>Aythya affinis</i>            | Aves     | Canada        |
| 61 | Koper and Schmiegelow 2006 | 2006 | Gadwall                  | <i>Mareca strepera</i>           | Aves     | Canada        |
| 62 | Koper and Schmiegelow 2006 | 2006 | Northern shoveler        | <i>Spatula clypeata</i>          | Aves     | Canada        |
| 63 | Koper and Schmiegelow 2006 | 2006 | Blue-winged Teal         | <i>Spatula discors</i>           | Aves     | Canada        |
| 64 | Moran-lopez et al. 2006    | 2006 | Cinereous Vulture        | <i>Aegypius monachus</i>         | Aves     | Spain         |
| 65 | Ozaki et al. 2006          | 2006 | Northern Goshawk         | <i>Accipiter gentilis</i>        | Aves     | Japan         |
| 66 | Rowland et al. 2006        | 2006 | Sage Grouse              | <i>Centrocercus urophasianus</i> | Aves     | US            |
| 67 | Sergio et al. 2006         | 2006 | Northern Goshawk         | <i>Accipiter gentilis</i>        | Aves     | Europe        |
| 68 | Sergio et al. 2006         | 2006 | Boreal Owl               | <i>Aegolius funereus</i>         | Aves     | Europe        |
| 69 | Sergio et al. 2006         | 2006 | Northern Long-eared Owl  | <i>Asio otus</i>                 | Aves     | Europe        |
| 70 | Sergio et al. 2006         | 2006 | Eurasian Pygmy-owl       | <i>Glaucidium passerinum</i>     | Aves     | Europe        |
| 71 | Sergio et al. 2006         | 2006 | Palawan Scops-owl        | <i>Otus fuliginosus</i>          | Aves     | Europe        |
| 72 | Sergio et al. 2006         | 2006 | Tawny Owl                | <i>Strix aluco</i>               | Aves     | Europe        |
| 73 | Thorne et al. 2006         | 2006 | Puma                     | <i>Puma concolor</i>             | Mammalia | US            |
| 74 | Castellon and Sieving 2007 | 2007 | Black-throated Huet-huet | <i>Pteroptochos tarnii</i>       | Aves     | South America |
| 75 | Castellon and Sieving 2007 | 2007 | Chuca Tapaculo           | <i>Scelorchilus rubecula</i>     | Aves     | South America |
| 76 | Koper and Schmiegelow 2007 | 2007 | Northern Pintail         | <i>Anas acuta</i>                | Aves     | Canada        |
| 77 | Koper and Schmiegelow 2007 | 2007 | Mallard                  | <i>Anas platyrhynchos</i>        | Aves     | Canada        |
| 78 | Koper and Schmiegelow 2007 | 2007 | Lesser Scaup             | <i>Aythya affinis</i>            | Aves     | Canada        |
| 79 | Koper and Schmiegelow 2007 | 2007 | Gadwall                  | <i>Mareca strepera</i>           | Aves     | Canada        |
| 80 | Koper and Schmiegelow 2007 | 2007 | Northern shoveler        | <i>Spatula clypeata</i>          | Aves     | Canada        |
| 81 | Koper and Schmiegelow 2007 | 2007 | Blue-winged Teal         | <i>Spatula discors</i>           | Aves     | Canada        |

|     |                            |      |                           |                                 |          |             |
|-----|----------------------------|------|---------------------------|---------------------------------|----------|-------------|
| 82  | Lynam et al. 2007          | 2007 | Tiger                     | <i>Panthera tigris</i>          | Mammalia | Malaysia    |
| 83  | Bar-David et al. 2008      | 2008 | Persian Fallow Deer       | <i>Dama mesopotamica</i>        | Mammalia | Israel      |
| 84  | Dalerum et al. 2008        | 2008 | Cheetah                   | <i>Acinonyx jubatus</i>         | Mammalia | Africa      |
| 85  | Dalerum et al. 2008        | 2008 | Spotted Hyaena            | <i>Crocuta crocuta</i>          | Mammalia | Africa      |
| 86  | Dalerum et al. 2008        | 2008 | Striped Hyaena            | <i>Hyaena hyaena</i>            | Mammalia | Africa      |
| 87  | Dalerum et al. 2008        | 2008 | African Wild Dog          | <i>Lycaon pictus</i>            | Mammalia | Africa      |
| 88  | Dalerum et al. 2008        | 2008 | Lion                      | <i>Panthera leo</i>             | Mammalia | Africa      |
| 89  | Dalerum et al. 2008        | 2008 | Leopard                   | <i>Panthera pardus</i>          | Mammalia | Africa      |
| 90  | Gallo-Reynoso et al. 2008  | 2008 | Neotropical Otter         | <i>Lontra longicaudis</i>       | Mammalia | Mexico      |
| 91  | Hurme et al. 2008          | 2008 | Siberian Flying Squirrel  | <i>Pteromys volans</i>          | Mammalia | Europe      |
| 92  | Keuroghlian and Eaton 2008 | 2008 | White-lipped Peccary      | <i>Tayassu pecari</i>           | Mammalia | Brazil      |
| 93  | Leech et al. 2008          | 2008 | New Zealand Kaka          | <i>Nestor meridionalis</i>      | Aves     | New Zealand |
| 94  | Mangas et al. 2008         | 2008 | European Wildcat          | <i>Felis silvestris</i>         | Mammalia | Spain       |
| 95  | Mangas et al. 2008         | 2008 | Beech Marten              | <i>Martes foina</i>             | Mammalia | Spain       |
| 96  | Mangas et al. 2008         | 2008 | Eurasian Badger           | <i>Meles meles</i>              | Mammalia | Spain       |
| 97  | Mangas et al. 2008         | 2008 | Red Fox                   | <i>Vulpes vulpes</i>            | Mammalia | Spain       |
| 98  | Roberge et al. 2008        | 2008 | White-backed Woodpecker   | <i>Dendrocopos leucotos</i>     | Aves     | Sweden      |
| 99  | Winchell and Doherty 2008  | 2008 | California Gnatcatcher    | <i>Polioptila californica</i>   | Aves     | US          |
| 100 | Beier et al. 2009          | 2009 | Puma                      | <i>Puma concolor</i>            | Mammalia | US          |
| 101 | Beier et al. 2009          | 2009 | American Badger           | <i>Taxidea taxus</i>            | Mammalia | US          |
| 102 | Beier et al. 2009          | 2009 | Kit Fox                   | <i>Vulpes macrotis</i>          | Mammalia | US          |
| 103 | Ciudad et al. 2009         | 2009 | Middle Spotted Woodpecker | <i>Leiopicus medius</i>         | Aves     | Spain       |
| 104 | Grigione et al. 2009       | 2009 | Jaguarundi                | <i>Herpailurus yagouaroundi</i> | Mammalia | US, Mexico  |
| 105 | Grigione et al. 2009       | 2009 | Ocelot                    | <i>Leopardus pardalis</i>       | Mammalia | US, Mexico  |
| 106 | Grigione et al. 2009       | 2009 | Jaguar                    | <i>Panthera onca</i>            | Mammalia | US, Mexico  |
| 107 | Mortelliti et al. 2009     | 2009 | Edible Dormouse           | <i>Glis glis</i>                | Mammalia | Italy       |

|     |                           |      |                             |                                   |          |                 |
|-----|---------------------------|------|-----------------------------|-----------------------------------|----------|-----------------|
| 108 | Muller et al. 2009        | 2009 | Middle Spotted Woodpecker   | <i>Leiopicus medius</i>           | Aves     | Germany         |
| 109 | Nekhay and Arriaza 2009   | 2009 | Iberian Lynx                | <i>Lynx pardinus</i>              | Mammalia | Spain           |
| 110 | Pruett et al. 2009        | 2009 | Lesser Prairie-chicken      | <i>Tympanuchus pallidicinctus</i> | Aves     | US              |
| 111 | Suazo et al. 2009         | 2009 | Florida Scrub-jay           | <i>Aphelocoma coerulescens</i>    | Aves     | US              |
| 112 | Carroll et al. 2010       | 2010 | Spotted Owl                 | <i>Strix occidentalis</i>         | Aves     | US              |
| 113 | Hansbauer et al. 2010     | 2010 | Rufous-breasted Leaf-tosser | <i>Sclerurus scansor</i>          | Aves     | Brazil          |
| 114 | Poulin et al. 2010        | 2010 | American Treecreeper        | <i>Certhia americana</i>          | Aves     | Canada          |
| 115 | Roberts et al. 2010       | 2010 | Bobcat                      | <i>Lynx rufus</i>                 | Mammalia | US              |
| 116 | Schlegel and Rupf 2010    | 2010 | European Tree Frog          | <i>Hyla arborea</i>               | Amphibia | Switzerland     |
| 117 | Tanneberger et al. 2010   | 2010 | Aquatic Warbler             | <i>Acrocephalus paludicola</i>    | Aves     | Pomerania       |
| 118 | Barua 2011                | 2011 | Jaguar                      | <i>Panthera onca</i>              | Mammalia | Trans-continent |
| 119 | Barua 2011                | 2011 | Tiger                       | <i>Panthera tigris</i>            | Mammalia | Trans-continent |
| 120 | Barua 2011                | 2011 | American Black Bear         | <i>Ursus americanus</i>           | Mammalia | Trans-continent |
| 121 | Barua 2011                | 2011 | Brown Bear                  | <i>Ursus arctos</i>               | Mammalia | Trans-continent |
| 122 | Blanco-Fontao et al. 2011 | 2011 | Western Capercaillie        | <i>Tetrao urogallus</i>           | Aves     | Spain           |
| 123 | Davis et al. 2011         | 2011 | Jaguar                      | <i>Panthera onca</i>              | Mammalia | Belize          |
| 124 | Edman et al. 2011         | 2011 | White-backed Woodpecker     | <i>Dendrocopos leucotos</i>       | Aves     | Poland          |
| 125 | Epps et al. 2011          | 2011 | African Savanna Elephant    | <i>Loxodonta africana</i>         | Mammalia | East Africa     |
| 126 | Moreno-Opo et al. 2011    | 2011 | Black Stork                 | <i>Ciconia nigra</i>              | Aves     | Spain           |
| 127 | Onorato et al. 2011       | 2011 | Puma                        | <i>Puma concolor</i>              | Mammalia | US              |
| 128 | Rozylowicz et al. 2011    | 2011 | Grey Wolf                   | <i>Canis lupus</i>                | Mammalia | Romania         |
| 129 | Rozylowicz et al. 2011    | 2011 | Eurasian Lynx               | <i>Lynx lynx</i>                  | Mammalia | Romania         |
| 130 | Rozylowicz et al. 2011    | 2011 | Brown Bear                  | <i>Ursus arctos</i>               | Mammalia | Romania         |
| 131 | Sinsch et al. 2011        | 2011 | Ahl's Reed Frog             | <i>Hyperolius castaneus</i>       | Amphibia | Rwanda, Congo   |
| 132 | Stighall et al. 2011      | 2011 | White-backed Woodpecker     | <i>Dendrocopos leucotos</i>       | Aves     | Sweden          |

|     |                                |      |                          |                             |          |                 |
|-----|--------------------------------|------|--------------------------|-----------------------------|----------|-----------------|
| 133 | Stoffyn-Egli and Willison 2011 | 2011 | American Beaver          | <i>Castor canadensis</i>    | Mammalia | US              |
| 134 | Ucarli 2011                    | 2011 | Grey Wolf                | <i>Canis lupus</i>          | Mammalia | Turkey          |
| 135 | Ucarli 2011                    | 2011 | Eurasian Lynx            | <i>Lynx lynx</i>            | Mammalia | Turkey          |
| 136 | Ucarli 2011                    | 2011 | Brown Bear               | <i>Ursus arctos</i>         | Mammalia | Turkey          |
| 137 | Burnham et al. 2012            | 2012 | Clouded Leopard          | <i>Neofelis nebulosa</i>    | Mammalia | Trans-continent |
| 138 | Burnham et al. 2012            | 2012 | Jaguar                   | <i>Panthera onca</i>        | Mammalia | Trans-continent |
| 139 | Burnham et al. 2012            | 2012 | Tiger                    | <i>Panthera tigris</i>      | Mammalia | Trans-continent |
| 140 | Cushman and Landguth 2012      | 2012 | Wolverine                | <i>Gulo gulo</i>            | Mammalia | US              |
| 141 | Cushman and Landguth 2012      | 2012 | American Marten          | <i>Martes americana</i>     | Mammalia | US              |
| 142 | Cushman and Landguth 2012      | 2012 | American Black Bear      | <i>Ursus americanus</i>     | Mammalia | US              |
| 143 | Forrest et al. 2012            | 2012 | Snow Leopard             | <i>Panthera uncia</i>       | Mammalia | Himalaya        |
| 144 | Navedo and Garaita 2012        | 2012 | Eurasian Spoonbill       | <i>Platalea leucorodia</i>  | Aves     | Spain           |
| 145 | Overdijk and Navedo 2012       | 2012 | Eurasian Spoonbill       | <i>Platalea leucorodia</i>  | Aves     | Spain           |
| 146 | Ratnayeke and van Manen 2012   | 2012 | Sloth Bear               | <i>Melursus ursinus</i>     | Mammalia | Sri Lanka       |
| 147 | Brambilla et al. 2013          | 2013 | Boreal Owl               | <i>Aegolius funereus</i>    | Aves     | Italy           |
| 148 | Brambilla et al. 2013          | 2013 | Black Woodpecker         | <i>Dryocopus martius</i>    | Aves     | Italy           |
| 149 | Denoel et al. 2013             | 2013 | Smooth Newt              | <i>Lissotriton vulgaris</i> | Amphibia | Europe          |
| 150 | Denoel et al. 2013             | 2013 | Great Crested Newt       | <i>Triturus cristatus</i>   | Amphibia | Europe          |
| 151 | Dinerstein et al. 2013         | 2013 | Tiger                    | <i>Panthera tigris</i>      | Mammalia | Trans-continent |
| 152 | McGranahan et al. 2013         | 2013 | Greater Prairie-chicken  | <i>Tympanuchus cupido</i>   | Aves     | US              |
| 153 | Reza et al. 2013               | 2013 | Sun Bear                 | <i>Helarctos malayanus</i>  | Mammalia | Malaysia        |
| 154 | Reza et al. 2013               | 2013 | Tiger                    | <i>Panthera tigris</i>      | Mammalia | Malaysia        |
| 155 | Reza et al. 2013               | 2013 | Sambar                   | <i>Rusa unicolor</i>        | Mammalia | Malaysia        |
| 156 | Reza et al. 2013               | 2013 | Malay Tapir              | <i>Tapirus indicus</i>      | Mammalia | Malaysia        |
| 157 | Shardlow and Hyatt 2013        | 2013 | American Black Bear      | <i>Ursus americanus</i>     | Mammalia | Canada          |
| 158 | Smith et al. 2013              | 2013 | Northern Flying Squirrel | <i>Glaucomys sabrinus</i>   | Mammalia | Canada          |
| 159 | Stermin et al. 2013            | 2013 | Western Water Rail       | <i>Rallus aquaticus</i>     | Aves     | Romania         |
| 160 | Alves et al. 2014              | 2014 | Western Marsh-harrier    | <i>Circus aeruginosus</i>   | Aves     | Europe          |
| 161 | Blicharska et al. 2014         | 2014 | White-backed Woodpecker  | <i>Dendrocopos leucotos</i> | Aves     | Sweden          |

|     |                             |      |                         |                                  |          |                 |
|-----|-----------------------------|------|-------------------------|----------------------------------|----------|-----------------|
| 162 | Booms et al. 2014           | 2014 | Short-eared Owl         | <i>Asio flammeus</i>             | Aves     | North America   |
| 163 | Breckheimer et al. 2014     | 2014 | Red-cockaded Woodpecker | <i>Leuconotopicus borealis</i>   | Aves     | US              |
| 164 | Copeland et al. 2014        | 2014 | Sage Grouse             | <i>Centrocercus urophasianus</i> | Aves     | US              |
| 165 | Gren et al. 2014            | 2014 | White-backed Woodpecker | <i>Dendrocopos leucotos</i>      | Aves     | Sweden          |
| 166 | Kaczensky et al. 2014       | 2014 | Bactrian Camel          | <i>Camelus ferus</i>             | Mammalia | Mongolia        |
| 167 | Kajtoch et al. 2014         | 2014 | Goosander               | <i>Mergus merganser</i>          | Aves     | Poland          |
| 168 | Rosner et al. 2014          | 2014 | Western Capercaillie    | <i>Tetrao urogallus</i>          | Aves     | Europe          |
| 169 | Tarjuelo et al. 2014        | 2014 | Great Bustard           | <i>Otis tarda</i>                | Aves     | Spain           |
| 170 | Tarjuelo et al. 2014        | 2014 | Little Bustard          | <i>Tetrax tetrax</i>             | Aves     | Spain           |
| 171 | Velo-Anton et al. 2014      | 2014 | Nile Crocodile          | <i>Crocodylus niloticus</i>      | Reptilia | Mauritania      |
| 172 | Winchell and Doherty 2014   | 2014 | California Gnatcatcher  | <i>Polioptila californica</i>    | Aves     | US              |
| 173 | Bell et al. 2015            | 2015 | White-backed Woodpecker | <i>Dendrocopos leucotos</i>      | Aves     | Sweden          |
| 174 | Burnett and Roberts 2015    | 2015 | Spotted Owl             | <i>Strix occidentalis</i>        | Aves     | US              |
| 175 | Carvalho et al. 2015        | 2015 | Chimpanzee              | <i>Pan troglodytes</i>           | Mammalia | Guinea-Bissau   |
| 176 | Chacon-Chaverri et al. 2015 | 2015 | Green Turtle            | <i>Chelonia mydas</i>            | Reptilia | Costa Rica      |
| 177 | Cristescu et al. 2015       | 2015 | Brown Bear              | <i>Ursus arctos</i>              | Mammalia | Canada          |
| 178 | Crosby et al. 2015          | 2015 | Northern Bobwhite       | <i>Colinus virginianus</i>       | Aves     | US              |
| 179 | Dickman et al. 2015         | 2015 | Sunda Clouded Leopard   | <i>Neofelis diardi</i>           | Mammalia | Trans-continent |
| 180 | Dickman et al. 2015         | 2015 | Leopard                 | <i>Panthera pardus</i>           | Mammalia | Trans-continent |
| 181 | Favilli et al. 2015         | 2015 | Grey Wolf               | <i>Canis lupus</i>               | Mammalia | Carpathians     |
| 182 | Favilli et al. 2015         | 2015 | European Hare           | <i>Lepus europaeus</i>           | Mammalia | Carpathians     |
| 183 | Favilli et al. 2015         | 2015 | Eurasian Otter          | <i>Lutra lutra</i>               | Mammalia | Carpathians     |
| 184 | Favilli et al. 2015         | 2015 | Eurasian Lynx           | <i>Lynx lynx</i>                 | Mammalia | Carpathians     |
| 185 | Favilli et al. 2015         | 2015 | Northern Chamois        | <i>Rupicapra rupicapra</i>       | Mammalia | Carpathians     |
| 186 | Favilli et al. 2015         | 2015 | Western Capercaillie    | <i>Tetrao urogallus</i>          | Aves     | Carpathians     |
| 187 | Favilli et al. 2015         | 2015 | Brown Bear              | <i>Ursus arctos</i>              | Mammalia | Carpathians     |
| 188 | Fedy et al. 2015            | 2015 | Sage Grouse             | <i>Centrocercus urophasianus</i> | Aves     | US              |
| 189 | Kiffner et al. 2015         | 2015 | Common Wildebeest       | <i>Connochaetes taurinus</i>     | Mammalia | Tanzania        |
| 190 | Kiffner et al. 2015         | 2015 | Plains Zebra            | <i>Equus quagga</i>              | Mammalia | Tanzania        |

|     |                          |      |                           |                                   |          |                |
|-----|--------------------------|------|---------------------------|-----------------------------------|----------|----------------|
| 191 | Litvaitis et al. 2015    | 2015 | Bobcat                    | <i>Lynx rufus</i>                 | Mammalia | US             |
| 192 | Lukacs et al. 2015       | 2015 | Gunnison Grouse           | <i>Centrocerus minimus</i>        | Aves     | US             |
| 193 | Masse et al. 2015        | 2015 | American Woodcock         | <i>Scolopax minor</i>             | Aves     | US             |
| 194 | McNew et al. 2015        | 2015 | Greater Prairie-chicken   | <i>Tympanuchus cupido</i>         | Aves     | US             |
| 195 | Mikolas et al. 2015      | 2015 | Western Capercaillie      | <i>Tetrao urogallus</i>           | Aves     | Central Europe |
| 196 | Nekaris et al. 2015      | 2015 | Red Slender Loris         | <i>Loris tardigradus</i>          | Mammalia | Sri Lanka      |
| 197 | Nekaris et al. 2015      | 2015 | Fishing Cat               | <i>Prionailurus viverrinus</i>    | Mammalia | Sri Lanka      |
| 198 | Proctor et al. 2015      | 2015 | Brown Bear                | <i>Ursus arctos</i>               | Mammalia | Canada, US     |
| 199 | Puri et al. 2015         | 2015 | Sloth Bear                | <i>Melursus ursinus</i>           | Mammalia | India          |
| 200 | Santangeli et al. 2015   | 2015 | White-tailed Sea-eagle    | <i>Haliaeetus albicilla</i>       | Aves     | Finland        |
| 201 | Viterbi et al. 2015      | 2015 | Black Grouse              | <i>Lyrurus tetrix</i>             | Aves     | Italy          |
| 202 | Winder et al. 2015       | 2015 | Greater Prairie-chicken   | <i>Tympanuchus cupido</i>         | Aves     | US             |
| 203 | Winder et al. 2015       | 2015 | Lesser Prairie-chicken    | <i>Tympanuchus pallidicinctus</i> | Aves     | US             |
| 204 | Alexander et al. 2016    | 2016 | Snow Leopard              | <i>Panthera uncia</i>             | Mammalia | China          |
| 205 | Bergner et al. 2016      | 2016 | White-backed Woodpecker   | <i>Dendrocopos leucotos</i>       | Aves     | Turkey         |
| 206 | Bergner et al. 2016      | 2016 | Syrian Woodpecker         | <i>Dendrocopos syriacus</i>       | Aves     | Turkey         |
| 207 | Bergner et al. 2016      | 2016 | Middle Spotted Woodpecker | <i>Leiopicus medius</i>           | Aves     | Turkey         |
| 208 | Bichet et al. 2016       | 2016 | Reindeer                  | <i>Rangifer tarandus</i>          | Mammalia | North America  |
| 209 | Burgas et al. 2016       | 2016 | Northern Goshawk          | <i>Accipiter gentilis</i>         | Aves     | Finland        |
| 210 | Burgas et al. 2016       | 2016 | Ural Owl                  | <i>Strix uralensis</i>            | Aves     | Finland        |
| 211 | Coates et al. 2016       | 2016 | Sage Grouse               | <i>Centrocerus urophasianus</i>   | Aves     | US             |
| 212 | Collins and du Toit 2016 | 2016 | Riverine Rabbit           | <i>Bunolagus monticularis</i>     | Mammalia | South Africa   |
| 213 | Dahlgren et al. 2016a    | 2016 | Sage Grouse               | <i>Centrocerus urophasianus</i>   | Aves     | US             |
| 214 | Dahlgren et al. 2016b    | 2016 | Sage Grouse               | <i>Centrocerus urophasianus</i>   | Aves     | US             |
| 215 | Gangadharan et al. 2016  | 2016 | Asian Elephant            | <i>Elephas maximus</i>            | Mammalia | India          |
| 216 | Gangadharan et al. 2016  | 2016 | Tiger                     | <i>Panthera tigris</i>            | Mammalia | India          |
| 217 | Higa et al. 2016         | 2016 | Blakiston's Eagle-owl     | <i>Bubo blakistoni</i>            | Aves     | Japan          |
| 218 | Higa et al. 2016         | 2016 | Red-crowned Crane         | <i>Grus japonensis</i>            | Aves     | Japan          |
| 219 | Ladin et al. 2016        | 2016 | Wood Thrush               | <i>Hylocichla mustelina</i>       | Aves     | US             |



|     |                             |      |                         |                                  |          |                          |
|-----|-----------------------------|------|-------------------------|----------------------------------|----------|--------------------------|
| 220 | Li and Pimm 2016            | 2016 | Giant Panda             | <i>Ailuropoda melanoleuca</i>    | Mammalia | China                    |
| 221 | Maslo et al. 2016           | 2016 | Piping Plover           | <i>Charadrius melodus</i>        | Aves     | US                       |
| 222 | Maslo et al. 2016           | 2016 | American Oystercatcher  | <i>Haematopus palliatus</i>      | Aves     | US                       |
| 223 | McKellar et al. 2016        | 2016 | Red-cockaded Woodpecker | <i>Leuconotopicus borealis</i>   | Aves     | US                       |
| 224 | Osipova and Sangermano 2016 | 2016 | Jaguar                  | <i>Panthera onca</i>             | Mammalia | Bolivia                  |
| 225 | Osipova and Sangermano 2016 | 2016 | Southern Tamandua       | <i>Tamandua tetradactyla</i>     | Mammalia | Bolivia                  |
| 226 | Osipova and Sangermano 2016 | 2016 | Lowland Tapir           | <i>Tapirus terrestris</i>        | Mammalia | Bolivia                  |
| 227 | Real et al. 2016            | 2016 | Bonelli's Eagle         | <i>Aquila fasciata</i>           | Aves     | Spain                    |
| 228 | Thornton et al. 2016        | 2016 | Jaguar                  | <i>Panthera onca</i>             | Mammalia | South and North America  |
| 229 | Bradsworth et al. 2017      | 2017 | Powerful Owl            | <i>Ninox strenua</i>             | Aves     | Australia                |
| 230 | Carlisle et al. 2017        | 2017 | Sage Grouse             | <i>Centrocercus urophasianus</i> | Aves     | US                       |
| 231 | Duvall et al. 2017          | 2017 | Sage Grouse             | <i>Centrocercus urophasianus</i> | Aves     | US                       |
| 232 | Fourcade et al. 2017        | 2017 | Corncrake               | <i>Crex crex</i>                 | Aves     | France                   |
| 233 | Gamo and Beck 2017          | 2017 | Sage Grouse             | <i>Centrocercus urophasianus</i> | Aves     | US                       |
| 234 | Johnson et al. 2017         | 2017 | Gopher Tortoise         | <i>Gopherus polyphemus</i>       | Reptilia | US                       |
| 235 | Johnson et al. 2017         | 2017 | Red-cockaded Woodpecker | <i>Leuconotopicus borealis</i>   | Aves     | US                       |
| 236 | Mikolas et al. 2017         | 2017 | Western Capercaillie    | <i>Tetrao urogallus</i>          | Aves     | Carpathians              |
| 237 | Morelli et al. 2017         | 2017 | Common Cuckoo           | <i>Cuculus canorus</i>           | Aves     | Ukraine, Poland, Denmark |
| 238 | Tomecek et al. 2017         | 2017 | Northern Bobwhite       | <i>Colinus virginianus</i>       | Aves     | US                       |
| 239 | Wang et al. 2017            | 2017 | Chinese Monal           | <i>Lophophorus lhuysii</i>       | Aves     | China                    |
| 240 | Winder et al. 2017          | 2017 | Greater Prairie-chicken | <i>Tympanuchus cupido</i>        | Aves     | US                       |
| 241 | Albert et al. 2018          | 2018 | Tiger                   | <i>Panthera tigris</i>           | Mammalia | Trans-continent          |
| 242 | Carlisle et al. 2018a       | 2018 | Sage Grouse             | <i>Centrocercus urophasianus</i> | Aves     | US                       |
| 243 | Carlisle et al. 2018b       | 2018 | Sage Grouse             | <i>Centrocercus urophasianus</i> | Aves     | US                       |

|     |                              |      |                         |                               |          |                         |
|-----|------------------------------|------|-------------------------|-------------------------------|----------|-------------------------|
| 244 | Cuadros-Casanova et al. 2018 | 2018 | Sokoke Scops-owl        | <i>Otus ireneae</i>           | Aves     | East Africa             |
| 245 | Diniz et al. 2018            | 2018 | Jaguar                  | <i>Panthera onca</i>          | Mammalia | Brazil                  |
| 246 | Elliott and Johnson 2018     | 2018 | Grasshopper Sparrow     | <i>Ammodramus savannarum</i>  | Aves     | US                      |
| 247 | Figel et al. 2018            | 2018 | Jaguar                  | <i>Panthera onca</i>          | Mammalia | Central America         |
| 248 | Gomez-Catasus et al. 2018    | 2018 | Dupont's Lark           | <i>Chersophilus duponti</i>   | Aves     | Spain                   |
| 249 | Hermes et al. 2018           | 2018 | Ecuadorian Tapaculo     | <i>Scytalopus robbinsi</i>    | Aves     | Ecuador                 |
| 250 | Hof and Hjalten 2018         | 2018 | White-backed Woodpecker | <i>Dendrocopos leucotos</i>   | Aves     | Sweden                  |
| 251 | Hofman et al. 2018           | 2018 | White-lipped Peccary    | <i>Tayassu pecari</i>         | Mammalia | Belize                  |
| 252 | Kittle et al. 2018           | 2018 | Leopard                 | <i>Panthera pardus</i>        | Mammalia | Sri Lanka               |
| 253 | Macdonald et al. 2018        | 2018 | Sunda Clouded Leopard   | <i>Neofelis diardi</i>        | Mammalia | Indonesia, Malaysia     |
| 254 | Stuber and Fontaine 2018     | 2018 | Grasshopper Sparrow     | <i>Ammodramus savannarum</i>  | Aves     | US                      |
| 255 | Stuber and Fontaine 2018     | 2018 | Lark Sparrow            | <i>Chondestes grammacus</i>   | Aves     | US                      |
| 256 | Stuber and Fontaine 2018     | 2018 | Northern Bobwhite       | <i>Colinus virginianus</i>    | Aves     | US                      |
| 257 | Stuber and Fontaine 2018     | 2018 | Common Pheasant         | <i>Phasianus colchicus</i>    | Aves     | US                      |
| 258 | Stuber and Fontaine 2018     | 2018 | Dickcissel              | <i>Spiza Americana</i>        | Aves     | US                      |
| 259 | Stuber and Fontaine 2018     | 2018 | Field Sparrow           | <i>Spizella pusilla</i>       | Aves     | US                      |
| 260 | Stuber and Fontaine 2018     | 2018 | Eastern Meadowlark      | <i>Sturnella magna</i>        | Aves     | US                      |
| 261 | Stuber and Fontaine 2018     | 2018 | Western Meadowlark      | <i>Sturnella neglecta</i>     | Aves     | US                      |
| 262 | Vieira et al. 2018           | 2018 | Black Skimmer           | <i>Rynchops niger</i>         | Aves     | South and North America |
| 263 | Wang et al. 2018             | 2018 | Giant Panda             | <i>Ailuropoda melanoleuca</i> | Mammalia | China                   |
| 264 | Wei et al. 2018              | 2018 | Giant Panda             | <i>Ailuropoda melanoleuca</i> | Mammalia | China                   |
| 265 | Wiersma and Sleep 2018       | 2018 | Reindeer                | <i>Rangifer tarandus</i>      | Mammalia | Canada                  |
| 266 | Banas et al. 2019            | 2019 | Black Stork             | <i>Ciconia nigra</i>          | Aves     | Poland                  |
| 267 | Brenner and McWilliams 2019  | 2019 | American Woodcock       | <i>Scolopax minor</i>         | Aves     | US                      |

|     |                                        |      |                        |                                  |          |                   |
|-----|----------------------------------------|------|------------------------|----------------------------------|----------|-------------------|
| 268 | Crespo-Gascon and Guerrero-Casado 2019 | 2019 | Spectacled Bear        | <i>Tremarctos ornatus</i>        | Mammalia | Andean ecoregions |
| 269 | Dinkins and Beck 2019                  | 2019 | Sage Grouse            | <i>Centrocercus urophasianus</i> | Aves     | US                |
| 270 | Drever et al. 2019                     | 2019 | Reindeer               | <i>Rangifer tarandus</i>         | Mammalia | Canada            |
| 271 | Ebenhoch et al. 2019                   | 2019 | Sage Grouse            | <i>Centrocercus urophasianus</i> | Aves     | US                |
| 272 | Gorfol et al. 2019                     | 2019 | Western Barbastelle    | <i>Barbastella barbastellus</i>  | Mammalia | Hungary           |
| 273 | Hawkes et al. 2019                     | 2019 | Eurasian Thick-knee    | <i>Burhinus oedicephalus</i>     | Aves     | UK                |
| 274 | Hof and Allen 2019                     | 2019 | Caucasian Grouse       | <i>Lyrurus mlokosiewiczi</i>     | Aves     | Europe            |
| 275 | Hof and Allen 2019                     | 2019 | Caucasian Snowcock     | <i>Tetraogallus caucasicus</i>   | Aves     | Europe            |
| 276 | Ionescu et al. 2019                    | 2019 | Black Stork            | <i>Ciconia nigra</i>             | Aves     | Romania           |
| 277 | Khosravi and Hemami 2019               | 2019 | Cheetah                | <i>Acinonyx jubatus</i>          | Mammalia | Iran              |
| 278 | Khosravi and Hemami 2019               | 2019 | Sand Cat               | <i>Felis margarita</i>           | Mammalia | Iran              |
| 279 | Khosravi and Hemami 2019               | 2019 | Leopard                | <i>Panthera pardus</i>           | Mammalia | Iran              |
| 280 | Klinga et al. 2019                     | 2019 | Western Capercaillie   | <i>Tetrao urogallus</i>          | Aves     | Central Europe    |
| 281 | Kramer et al. 2019                     | 2019 | American Woodcock      | <i>Scolopax minor</i>            | Aves     | US                |
| 282 | Kramer et al. 2019                     | 2019 | Golden-winged Warbler  | <i>Vermivora chrysoptera</i>     | Aves     | US                |
| 283 | Kumar et al. 2019                      | 2019 | Tiger                  | <i>Panthera tigris</i>           | Mammalia | India             |
| 284 | Lamb et al. 2019                       | 2019 | Long-tailed Duck       | <i>Clangula hyemalis</i>         | Aves     | North America     |
| 285 | Lee et al. 2019                        | 2019 | Yellow-throated Marten | <i>Martes flavigula</i>          | Mammalia | South Korea       |
| 286 | Li et al. 2019                         | 2019 | Asian Elephant         | <i>Elephas maximus</i>           | Mammalia | China             |
| 287 | Macdonald et al. 2019                  | 2019 | Clouded Leopard        | <i>Neofelis nebulosa</i>         | Mammalia | Asia              |
| 288 | Moran et al. 2019                      | 2019 | Jaguar                 | <i>Panthera onca</i>             | Mammalia | Costa Rica        |
| 289 | Pratt et al. 2019                      | 2019 | Sage Grouse            | <i>Centrocercus urophasianus</i> | Aves     | US                |
| 290 | Puverel et al. 2019                    | 2019 | Black Woodpecker       | <i>Dryocopus martius</i>         | Aves     | France            |
| 291 | Runge et al. 2019                      | 2019 | Gunnison Grouse        | <i>Centrocercus minimus</i>      | Aves     | US                |
| 292 | Runge et al. 2019                      | 2019 | Sage Grouse            | <i>Centrocercus urophasianus</i> | Aves     | US                |
| 293 | Shi et al. 2019                        | 2019 | Giant Panda            | <i>Ailuropoda melanoleuca</i>    | Mammalia | China             |
| 294 | Shi et al. 2019                        | 2019 | Red Panda              | <i>Ailurus fulgens</i>           | Mammalia | China             |

|     |                         |      |                                  |                                  |          |           |
|-----|-------------------------|------|----------------------------------|----------------------------------|----------|-----------|
| 295 | Shi et al. 2019         | 2019 | Chinese Giant Salamander         | <i>Andrias davidianus</i>        | Amphibia | China     |
| 296 | Shi et al. 2019         | 2019 | Golden Eagle                     | <i>Aquila chrysaetos</i>         | Aves     | China     |
| 297 | Shi et al. 2019         | 2019 | Baer's Pochard                   | <i>Aythya baeri</i>              | Aves     | China     |
| 298 | Shi et al. 2019         | 2019 | Takin                            | <i>Budorcas taxicolor</i>        | Mammalia | China     |
| 299 | Shi et al. 2019         | 2019 | Chinese Three-striped Box Turtle | <i>Cuora trifasciata</i>         | Reptilia | China     |
| 300 | Shi et al. 2019         | 2019 | Yellow-breasted Bunting          | <i>Emberiza aureola</i>          | Aves     | China     |
| 301 | Shi et al. 2019         | 2019 | Bearded Vulture                  | <i>Gypaetus barbatus</i>         | Aves     | China     |
| 302 | Shi et al. 2019         | 2019 | Chinese Monal                    | <i>Lophophorus lhuysii</i>       | Aves     | China     |
| 303 | Shi et al. 2019         | 2019 | Forest Musk Deer                 | <i>Moschus berezovskii</i>       | Mammalia | China     |
| 304 | Shi et al. 2019         | 2019 | Red Goral                        | <i>Naemorhedus baileyi</i>       | Mammalia | China     |
| 305 | Shi et al. 2019         | 2019 | Clouded Leopard                  | <i>Neofelis nebulosa</i>         | Mammalia | China     |
| 306 | Shi et al. 2019         | 2019 | Bengal Slow Loris                | <i>Nycticebus bengalensis</i>    | Mammalia | China     |
| 307 | Shi et al. 2019         | 2019 | Pygmy Slow Loris                 | <i>Nycticebus pygmaeus</i>       | Mammalia | China     |
| 308 | Shi et al. 2019         | 2019 | Tiger                            | <i>Panthera tigris</i>           | Mammalia | China     |
| 309 | Shi et al. 2019         | 2019 | Snow Leopard                     | <i>Panthera uncia</i>            | Mammalia | China     |
| 310 | Shi et al. 2019         | 2019 | Golden Snub-nosed Monkey         | <i>Rhinopithecus roxellana</i>   | Mammalia | China     |
| 311 | Shi et al. 2019         | 2019 | Cabot's Tragopan                 | <i>Tragopan caboti</i>           | Aves     | China     |
| 312 | Sibarani et al. 2019    | 2019 | Sumatran Rhinoceros              | <i>Dicerorhinus sumatrensis</i>  | Mammalia | Indonesia |
| 313 | Sibarani et al. 2019    | 2019 | Asian Elephant                   | <i>Elephas maximus</i>           | Mammalia | Indonesia |
| 314 | Sibarani et al. 2019    | 2019 | Tiger                            | <i>Panthera tigris</i>           | Mammalia | Indonesia |
| 315 | Sibarani et al. 2019    | 2019 | Sumatran Orangutan               | <i>Pongo abelii</i>              | Mammalia | Indonesia |
| 316 | Sitzia et al. 2019      | 2019 | Western Capercaillie             | <i>Tetrao urogallus</i>          | Aves     | Alps      |
| 317 | Smith et al. 2019       | 2019 | Sage Grouse                      | <i>Centrocercus urophasianus</i> | Aves     | US        |
| 318 | Stewart et al. 2019     | 2019 | Blunt-nosed Leopard Lizard       | <i>Gambelia sila</i>             | Reptilia | US        |
| 319 | Timmer et al. 2019      | 2019 | Sage Grouse                      | <i>Centrocercus urophasianus</i> | Aves     | US        |
| 320 | Agha et al. 2020        | 2020 | Sage Grouse                      | <i>Centrocercus urophasianus</i> | Aves     | US        |
| 321 | Agha et al. 2020        | 2020 | Mojave Desert Tortoise           | <i>Gopherus agassizii</i>        | Reptilia | US        |
| 322 | Allen et al. 2020       | 2020 | Tiger                            | <i>Panthera tigris</i>           | Mammalia | Indonesia |
| 323 | Ashrafzadeh et al. 2020 | 2020 | Cheetah                          | <i>Acinonyx jubatus</i>          | Mammalia | Iran      |
| 324 | Ashrafzadeh et al. 2020 | 2020 | Caracal                          | <i>Caracal caracal</i>           | Mammalia | Iran      |
| 325 | Ashrafzadeh et al. 2020 | 2020 | Afro-Asiatic Wildcat             | <i>Felis lybica</i>              | Mammalia | Iran      |

|     |                                  |      |                                   |                                  |          |                                     |
|-----|----------------------------------|------|-----------------------------------|----------------------------------|----------|-------------------------------------|
| 326 | Ashrafzadeh et al. 2020          | 2020 | Eurasian Lynx                     | <i>Lynx lynx</i>                 | Mammalia | Iran                                |
| 327 | Ashrafzadeh et al. 2020          | 2020 | Pallas's Cat                      | <i>Otocolobus manul</i>          | Mammalia | Iran                                |
| 328 | Ashrafzadeh et al. 2020          | 2020 | Leopard                           | <i>Panthera pardus</i>           | Mammalia | Iran                                |
| 329 | Barlow et al. 2020               | 2020 | Sage Grouse                       | <i>Centrocercus urophasianus</i> | Aves     | US                                  |
| 330 | Brennan et al. 2020              | 2020 | African Savanna Elephant          | <i>Loxodonta africana</i>        | Mammalia | Botswana, Namibia, Zambia, Zimbabwe |
| 331 | Burivalova et al. 2020           | 2020 | Sunda Clouded Leopard             | <i>Neofelis diardi</i>           | Mammalia | Indonesia                           |
| 332 | Burivalova et al. 2020           | 2020 | Bornean Orangutan                 | <i>Pongo pygmaeus</i>            | Mammalia | Indonesia                           |
| 333 | Carlisle and Chalfoun, 2020      | 2020 | Sage Grouse                       | <i>Centrocercus urophasianus</i> | Aves     | US                                  |
| 334 | Carter et al. 2020               | 2020 | Tiger                             | <i>Panthera tigris</i>           | Mammalia | Asia                                |
| 335 | Drake et al. 2020                | 2020 | Northern Myotis                   | <i>Myotis septentrionalis</i>    | Mammalia | US                                  |
| 336 | Drake et al. 2020                | 2020 | Eastern Pipistrelle               | <i>Perimyotis subflavus</i>      | Mammalia | US                                  |
| 337 | Freire Filho and Palmeirim, 2020 | 2020 | Maranhão Red-handed Howler Monkey | <i>Alouatta ululata</i>          | Mammalia | Brazil                              |
| 338 | Hamalainen et al. 2020           | 2020 | White-backed Woodpecker           | <i>Dendrocopos leucotos</i>      | Aves     | Finland                             |
| 339 | Hardy et al., 2020               | 2020 | Greater Prairie-chicken           | <i>Tympanuchus cupido</i>        | Aves     | US                                  |
| 340 | Herrera-Sanchez et al. 2020      | 2020 | Cuvier's Gazelle                  | <i>Gazella cuvieri</i>           | Mammalia | North Africa                        |
| 341 | Klinga et al. 2020               | 2020 | Western Capercaillie              | <i>Tetrao urogallus</i>          | Aves     | Europe                              |
| 342 | Li et al. 2020                   | 2020 | Giant Panda                       | <i>Ailuropoda melanoleuca</i>    | Mammalia | China                               |
| 343 | Linero et al., 2020              | 2020 | Common Woolly Monkey              | <i>Lagothrix lagothricha</i>     | Mammalia | Amazon and Andes                    |
| 344 | Mena et al. 2020                 | 2020 | Jaguar                            | <i>Panthera onca</i>             | Mammalia | Colombia, Ecuador, Peru             |
| 345 | Natsukawa et al. 2020            | 2020 | Northern Goshawk                  | <i>Accipiter gentilis</i>        | Aves     | Japan                               |
| 346 | Ortiz-Urbina et al. 2020         | 2020 | Cinereous Vulture                 | <i>Aegypius monachus</i>         | Aves     | Spain                               |
| 347 | Petersen et al., 2020            | 2020 | Clouded Leopard                   | <i>Neofelis nebulosa</i>         | Mammalia | Southeast Asia                      |
| 348 | Pilliod et al. 2020              | 2020 | Sage Grouse                       | <i>Centrocercus urophasianus</i> | Aves     | US                                  |
| 349 | Ruiz-Garcia et al. 2020          | 2020 | Spectacled Bear                   | <i>Tremarctos ornatus</i>        | Mammalia | Ecuador                             |

|     |                              |      |                       |                                  |          |                      |
|-----|------------------------------|------|-----------------------|----------------------------------|----------|----------------------|
| 350 | Shen et al. 2020             | 2020 | Giant Panda           | <i>Ailuropoda melanoleuca</i>    | Mammalia | China                |
| 351 | Ward et al. 2020             | 2020 | Regent Honeyeater     | <i>Anthochaera phrygia</i>       | Aves     | Australia            |
| 352 | Ward et al. 2020             | 2020 | Australasian Bittern  | <i>Botaurus poiciloptilus</i>    | Aves     | Australia            |
| 353 | Ward et al. 2020             | 2020 | Red Goshawk           | <i>Erythrotriorchis radiatus</i> | Aves     | Australia            |
| 354 | Ward et al. 2020             | 2020 | Far Eastern Curlew    | <i>Numenius madagascariensis</i> | Aves     | Australia            |
| 355 | Ward et al. 2020             | 2020 | Koala                 | <i>Phascolarctos cinereus</i>    | Mammalia | Australia            |
| 356 | Xu et al. 2020               | 2020 | Chinese Monal         | <i>Lophophorus lhuysii</i>       | Aves     | China                |
| 357 | Andesner et al., 2021        | 2021 | Western Capercaillie  | <i>Tetrao urogallus</i>          | Aves     | Austria              |
| 358 | Barichievsky et al., 2021    | 2021 | Black Rhino           | <i>Diceros bicornis</i>          | Mammalia | Kenya                |
| 359 | Beranek et al., 2021         | 2021 | Golden Bell Frog      | <i>Litoria aurea</i>             | Amphibia | Australia            |
| 360 | Buffum et al., 2021          | 2021 | American Woodcock     | <i>Scolopax minor</i>            | Aves     | US                   |
| 361 | Curveira-Santos et al., 2021 | 2021 | Lion                  | <i>Panthera leo</i>              | Mammalia | South Africa         |
| 362 | Dai et al., 2021             | 2021 | Brown bear            | <i>Ursus arctos</i>              | Mammalia | Hindu Kush Himalayan |
| 363 | Kim et al., 2021             | 2021 | White-naped Crane     | <i>Grus vipio</i>                | Aves     | Korean DMZ           |
| 364 | Lohmus et al., 2021          | 2021 | Black Stork           | <i>Ciconia nigra</i>             | Aves     | Estonia              |
| 365 | Mizsei et al., 2021          | 2021 | Greek Meadow Viper    | <i>Vipera graeca</i>             | Reptilia | Greece/Albania       |
| 366 | Mukherjee et al., 2021       | 2021 | Brown Bear            | <i>Ursus arctos</i>              | Mammalia | Himalayan region     |
| 367 | Penjor et al., 2021          | 2021 | Mainland Serow        | <i>Capricornis sumatraensis</i>  | Mammalia | Bhutan               |
| 368 | Penjor et al., 2021          | 2021 | Asiatic Golden Cat    | <i>Catopuma temminckii</i>       | Mammalia | Bhutan               |
| 369 | Penjor et al., 2021          | 2021 | Southern Red Muntjac  | <i>Muntiacus muntjak</i>         | Mammalia | Bhutan               |
| 370 | Penjor et al., 2021          | 2021 | Sambar                | <i>Rusa unicolor</i>             | Mammalia | Bhutan               |
| 371 | Penjor et al., 2021          | 2021 | Wild Boar             | <i>Sus scrofa</i>                | Mammalia | Bhutan               |
| 372 | Rose et al., 2021            | 2021 | Sage Grouse           | <i>Centrocerus urophasianus</i>  | Aves     | Canada               |
| 373 | Rosenblatt et al., 2021      | 2021 | Northern Bobwhite     | <i>Colinus virginianus</i>       | Aves     | US                   |
| 374 | Singer et al., 2021          | 2021 | Bechstein's Myotis    | <i>Myotis bechsteinii</i>        | Mammalia | Germany              |
| 375 | Smith et al., 2021           | 2021 | Sage Grouse           | <i>Centrocerus urophasianus</i>  | Aves     | US                   |
| 376 | Wang et al., 2021            | 2021 | Giant Panda           | <i>Ailuropoda melanoleuca</i>    | Mammalia | China                |
| 377 | Westekemper et al., 2021     | 2021 | European Wildcat      | <i>Felis silvestris</i>          | Mammalia | Germany              |
| 378 | Xu et al., 2021              | 2021 | Scaly-sided Merganser | <i>Mergus squamatus</i>          | Aves     | China                |
| 379 | Zhao et al., 2021            | 2021 | Giant Panda           | <i>Ailuropoda melanoleuca</i>    | Mammalia | China                |
